# Supplementary material for: Flavanol-Rich Cocoa Powder Interacts with Lactobacillus rhamnossus LGG to Alter the Antibody Response to Infection with the Parasitic Nematode Ascaris suum
Source: MDPI journal article supplement (doi:10.3390/nu9101113), 2017-10-12
Supplement: s1 [file s1]

## Online Support Materials

**Table S1. Pig diet**

| Nutrients                        | g/ kg diet |
|----------------------------------|------------|
| Protein                          | 153.2      |
| Fat                              | 26.1       |
| Fiber                            | 34.1       |
| Total Kcal/kg diet               | 2957 kcal  |
| Ingredients                      | g          |
| Corn                             | 718.9      |
| 48% Soybean meal                 | 198.8      |
| Alfalfa meal 17%                 | 50.0       |
| Salt                             | 5.0        |
| Calcium Carbonate                | 5.8        |
| <sup>1</sup> Swine trace mineral | 1.0        |
| <sup>2</sup> Swine vitamins      | 1.0        |
| Selenium premix                  | 0.5        |
| Choline 60%                      | 0.3        |
| Soybean oil                      | 2.5        |
| Monocalcium phosphate            | 16.3       |
| Total                            | 1000       |

| Dietary Treatment            | Treatment |    |
|------------------------------|-----------|----|
| Cocoa powder (g/d)           | 0         | 26 |
| <sup>3</sup> Dextrin (g/d)   | 1.24      | 0  |
| <sup>4</sup> Cellulose (g/d) | 6.42      | 0  |

<sup>1</sup> Swine trace mineral (PIGMASTER G.F 50 from ADM Alliance Nutrition) per kg: Calcium 22%- 26.4%, Phosphorus 6%, Salt 12% -14.4%, Selenium 12 ppm, Zinc 2450 ppm

<sup>2</sup> Swine vitamins (SWINE VITAMIN PREMIX from DSM) per kg: Vitamin A 4,409,171 IU, Vitamin D3 881,834 IU, Vitamin B12 44 mg, Riboflavin 8,818 mg, d-Pantothenic Acid 17,637 mg, Niacin 30,864 mg

<sup>3,4</sup> Dextrin and cellulose were added to match total soluble and insoluble fiber of cocoa powder.

**Table S2. Biochemical Serum markers at week 7**

| Index                         | Treatment | wk 0         | wk 7         | p-value |
|-------------------------------|-----------|--------------|--------------|---------|
| ALP<br>118-395 U/L*           | Control   | 158.14±24.19 | 151.71±22.35 |         |
|                               | LGG       | 184.77±15.19 | 195.66±18.22 |         |
|                               | Cocoa     | 150.62±12.09 | 136.50±8.89  |         |
|                               | LGG+Cocoa | 180.25±18.39 | 162.62±14.19 |         |
| ALT<br>31-58 U/L              | Control   | 54.86±5.47   | 60.28±3.60   |         |
|                               | LGG       | 47.33±3.31   | 50.33±6.41   |         |
|                               | Cocoa     | 47.75±3.89   | 46.87±5.55   |         |
|                               | LGG+Cocoa | 44.12±2.66   | 54.62±5.30   |         |
| AST<br>32-84 U/L              | Control   | 33.86±4.50   | 27.57±2.39   |         |
|                               | LGG       | 38.22±4.31   | 34.89±4.37   |         |
|                               | Cocoa     | 35.62±4.74   | 28.62±3.36   |         |
|                               | LGG+Cocoa | 30.63±4.52   | 30.13±2.65   |         |
| Total bilirubin<br>0-10 mg/dL | Control   | 0.129±0.02   | 0.100±0.00   | 0.004   |
|                               | LGG       | 0.122±0.01   | 0.156±0.02   |         |
|                               | Cocoa     | 0.125±0.02   | 0.138±0.02   |         |
|                               | LGG+Cocoa | 0.100±0.00   | 0.163±0.02   |         |
| LDH<br>380-634 U/L            | Control   | 482±28.35    | 610±71.4     | 0.021   |
|                               | LGG       | 593±33.60    | 684.78±69.41 |         |
|                               | Cocoa     | 525.38±22.74 | 622.75±51.31 |         |
|                               | LGG+Cocoa | 508±38.89    | 661.75±35.23 |         |
| GGT<br>10-60 U/L              | Control   | 38±1.77      | 43.28±3.48   | 0.011   |
|                               | LGG       | 41.22±3.14   | 42.22±3.64   |         |
|                               | Cocoa     | 38.87±2.92   | 39.87±3.23   |         |
|                               | LGG+Cocoa | 39.63±2.32   | 44.50±3.92   |         |

|               |           |           |           |       |
|---------------|-----------|-----------|-----------|-------|
| Total protein | Control   | 6.60±0.21 | 8.50±0.31 | 0.003 |
| 7.9-8.9 g/dL  | LGG       | 7.0±1.96  | 7.87±0.46 |       |
|               | Cocoa     | 6.65±0.24 | 7.20±0.53 |       |
|               | LGG+Cocoa | 6.65±0.15 | 7.72±0.26 | 0.003 |

\* Indicate normal values expressed in U/L for ALP,ALT,AST,LDH,GGT enzymes and mg/dL for bilirubin AST= Aspartate Transaminase; LDH=Lactate Dehydrogenase; or g/dL for total protein; ALP=Alkaline Phosphatase; ALT= Alanine Transaminase; AST= Aspartate Transaminase; LDH=Lactate Dehydrogenase; ALP=Alanine Phosphatase  
ALT= Alanine Transaminase; AST= Aspartate Transaminase; LDH=Lactate Dehydrogenase; GGT=Gamma-glutamyl transferase

**Table S3. Dietary induced gene expression changes in lymph nodes**

| GENE  |     | Dietary Intervention |                 |                       |                                       |                     |                                       |                     |                                       |       |                         | Main effects <sup>3</sup> |  |                    |
|-------|-----|----------------------|-----------------|-----------------------|---------------------------------------|---------------------|---------------------------------------|---------------------|---------------------------------------|-------|-------------------------|---------------------------|--|--------------------|
|       |     | Control              |                 | Cocoa                 |                                       | LGG                 |                                       | LGG + Cocoa         |                                       | Diet  | Treatment               |                           |  | Diet*<br>Treatment |
|       |     | $\Delta C_T^1$       | Fold of control | $\Delta C_T$<br>Cocoa | Fold relative to control <sup>2</sup> | $\Delta C_T$        | Fold relative to control <sup>2</sup> | $\Delta C_T$        | Fold relative to control <sup>2</sup> |       |                         |                           |  |                    |
| EPX   | TBL | 12.82 $\pm$          |                 | 12.30 $\pm$           |                                       | 14.85 $\pm$         |                                       | 14.31 $\pm$         |                                       |       |                         |                           |  |                    |
|       | N   | 0.61 <sup>ab</sup>   | 1               | 0.61 <sup>a</sup>     | 1.5                                   | 0.61 <sup>c</sup>   | 0.2                                   | 0.61 <sup>abc</sup> | 0.3                                   | 0.402 | <b>0.003</b>            | 0.991                     |  |                    |
|       | MLN | 16.53 $\pm$<br>0.73  | 1               | 15.53 $\pm$<br>0.73   | 2                                     | 15.20 $\pm$<br>0.73 | 2.6                                   | 14.94 $\pm$<br>0.73 | 3                                     | 0.397 | 0.201                   | 0.613                     |  |                    |
| CCL26 | TBL | 3.87 $\pm$           |                 | 3.38 $\pm$            |                                       | 4.73 $\pm$          |                                       | 4.21 $\pm$          |                                       |       |                         |                           |  |                    |
|       | N   | 0.33 <sup>ab</sup>   | 1               | 0.33 <sup>a</sup>     | 1.4                                   | 0.33 <sup>b</sup>   | 0.5                                   | 0.33 <sup>ab</sup>  | 0.8                                   | 0.133 | <b>0.016</b>            | 0.957                     |  |                    |
|       | MLN | 4.47 $\pm$<br>0.48   | 1               | 4.11 $\pm$<br>0.48    | 1.3                                   | 4.31 $\pm$<br>0.48  | 1.1                                   | 4.40 $\pm$<br>0.48  | 1                                     | 0.783 | 0.892                   | 0.644                     |  |                    |
| IL-13 | TBL | 13.38 $\pm$          | 1               | 13.59 $\pm$           |                                       | 15.48 $\pm$         |                                       | 14.69 $\pm$         |                                       |       |                         |                           |  |                    |
|       | N   | 0.41 <sup>a</sup>    | 1               | 0.41 <sup>ab</sup>    | 0.8                                   | 0.41 <sup>c</sup>   | 0.2                                   | 0.41 <sup>bc</sup>  | 0.4                                   | 0.493 | <b>0.001</b>            | 0.231                     |  |                    |
|       | MLN | 14.08 $\pm$<br>0.69  | 1               | 13.05 $\pm$<br>0.69   | 2                                     | 13.48 $\pm$<br>0.69 | 1.5                                   | 13.68 $\pm$<br>0.69 | 1.3                                   | 0.555 | 0.982                   | 0.380                     |  |                    |
| TLR2  | TBL | 8.85 $\pm$           |                 | 8.58 $\pm$            |                                       | 10.50 $\pm$         |                                       | 10.04 $\pm$         |                                       |       |                         |                           |  |                    |
|       | N   | 0.53 <sup>a</sup>    | 1               | 0.53 <sup>a</sup>     | 1.2                                   | 0.53 <sup>b</sup>   | 0.3                                   | 0.53 <sup>ab</sup>  | 0.4                                   | 0.505 | <b>0.008</b>            | 0.860                     |  |                    |
|       | MLN | 11.90 $\pm$<br>0.68  | 1               | 11.59 $\pm$<br>0.68   | 1.2                                   | 10.75 $\pm$<br>0.68 | 2.2                                   | 10.56 $\pm$<br>0.68 | 2.5                                   | 0.719 | 0.120                   | 0.935                     |  |                    |
| TLR4  | TBL | 7.82 $\pm$           |                 | 7.59 $\pm$            |                                       | 9.03 $\pm$          |                                       | 7.88 $\pm$          |                                       |       |                         |                           |  |                    |
|       | N   | 0.40 <sup>a</sup>    | 1               | 0.40 <sup>a</sup>     | 1.2                                   | 0.40 <sup>b</sup>   | 0.5                                   | 0.40 <sup>a</sup>   | 0.9                                   | 0.097 | 0.072                   | 0.259                     |  |                    |
|       | MLN | 9.30 $\pm$<br>0.85   | 1               | 8.79 $\pm$<br>0.85    | 1.4                                   | 8.67 $\pm$<br>0.85  | 1.5                                   | 6.80 $\pm$<br>0.85  | 5.6                                   | 0.172 | 0.136<br>mean $\pm$ SD) | 0.427                     |  |                    |
| TLR9  | TBL | 9.83 $\pm$           | 1               | 9.65 $\pm$            | 1.1                                   | 10.92 $\pm$         | 0.5                                   | 10.85 $\pm$         | 0.5                                   | 0.736 | <b>0.004</b>            | 0.872                     |  |                    |

|             |     |                   |   |                    |     |                   |     |                    |     |       |        |        |
|-------------|-----|-------------------|---|--------------------|-----|-------------------|-----|--------------------|-----|-------|--------|--------|
|             | N   | 0.36 <sup>a</sup> |   | 0.36 <sup>a</sup>  |     | 0.36 <sup>b</sup> |     | 0.36 <sup>b</sup>  |     |       |        |        |
|             |     | 14.26 ±           |   | 13.67 ±            |     | 14.70 ±           |     | 13.42 ±            |     |       |        |        |
|             | MLN | 0.81              | 1 | 0.81               | 1.5 | 0.81              | 0.7 | 0.81               | 1.8 | 0.264 | 0.908  | 0.675  |
|             | TBL | 12.75 ±           |   | 13.18 ±            |     | 14.13 ±           |     | 13.19 ±            |     | 0.564 |        |        |
| <i>IL1b</i> | N   | 0.43 <sup>a</sup> | 1 | 0.43 <sup>ab</sup> | 0.7 | 0.43 <sup>b</sup> | 0.4 | 0.43 <sup>ab</sup> | 0.7 | 3     | 0.1191 | 0.1251 |
|             |     | 13.28 ±           |   | 14.36 ±            |     | 13.80 ±           |     | 14.06 ±            |     | 0.535 |        |        |
|             | MLN | 1.07              | 1 | 1.07               | 0.4 | 1.07              | 0.7 | 1.07               | 0.6 | 8     | 0.9226 | 0.7084 |

<sup>1</sup> Data represent  $\Delta$ Ct values after gene expression was normalized to the housekeeping gene (Ct gene-Ct housekeeping gene) for each dietary treatment

<sup>2</sup> Changes in gene expression expressed as fold change compared to the control group which was designated as 1 fold change.

<sup>3</sup> Data represent p-values associated with the diet, treatment or Diet \* Treatment effects from the normally distributed ANOVA model
